# Supplementary material
Source: PubMed Central journal article supplement (PMC3781977)
Supplement: supp_113.155341_FigureS1.pdf [file supp_113.155341_FigureS1.pdf]

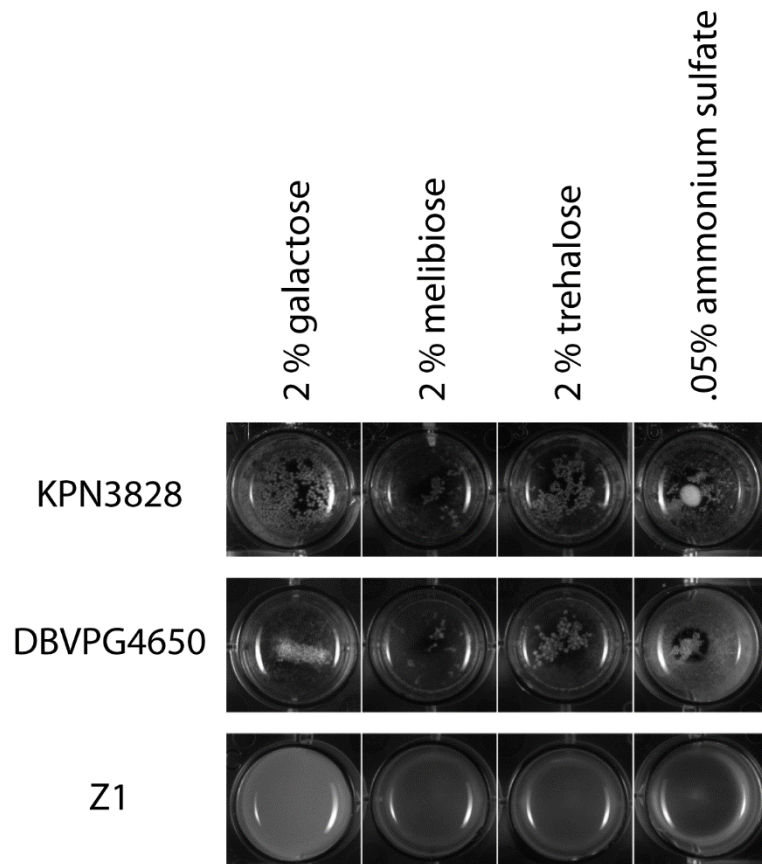

**Figure S1 A subset of European *S. paradoxus* strains flocculate in a variety of conditions.** Each photograph shows a liquid culture of a homozygous European *S. paradoxus* strain after overnight growth, with each row showing one strain and each column showing one treatment condition. Galactose, melibiose, and trehalose indicate media with the respective sugar as the sole carbon source. Ammonium sulfate indicates synthetic complete medium with 2% glucose and ammonium sulfate as the sole nitrogen source. The top two rows show representative flocculent strains and the bottom row shows the non-flocculent strain Z1.
