# Supplementary material
Source: PubMed Central journal article supplement (PMC3781977)
Supplement: supp_113.155341_FigureS4.pdf [file supp_113.155341_FigureS4.pdf]

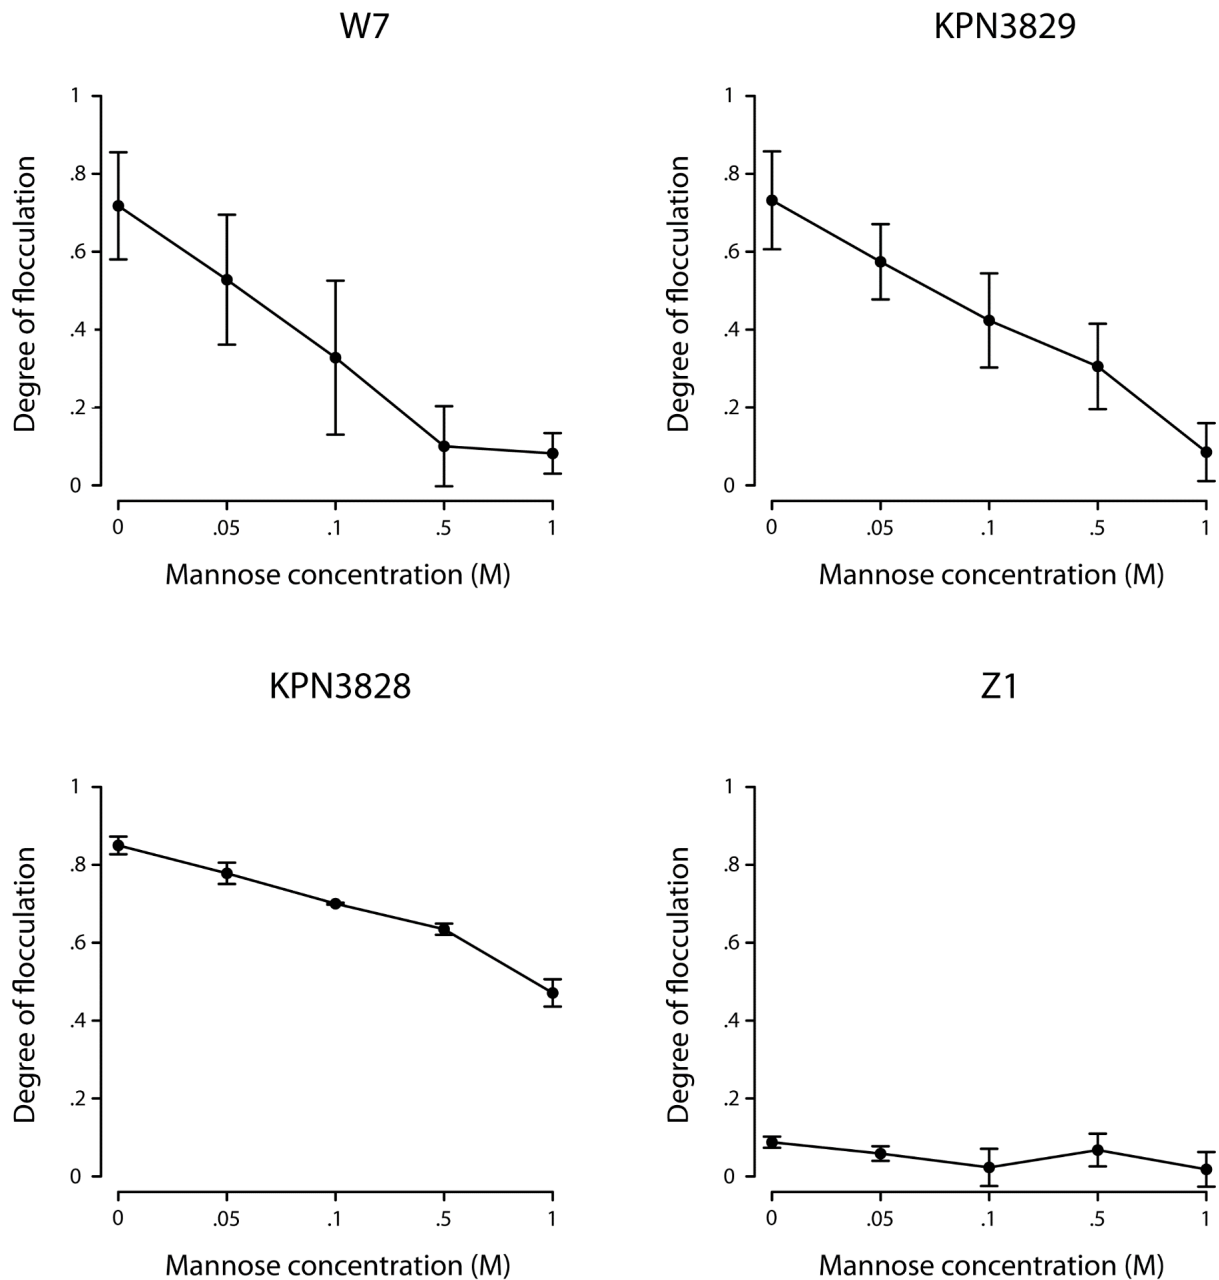

**Figure S4 Flocculation is inhibited by mannose.** Each panel shows the response of flocculation to increasing concentrations of mannose in one European *S. paradoxus* strain. In each panel, the x axis reports mannose concentration and the y axis reports flocculation, as measured by cell density at the top of a liquid culture allowed to settle, normalized by the analogous quantity from a culture treated with EDTA. Each data point represents the mean of three replicate cultures, and error bars report one standard deviation. Note that mannose had no effect on spatial inhomogeneity of cultures of the non-flocculent European strain Z1 (lower right), while the other three flocculent strains (see Figure 1A of the main text), are sensitive to mannose.
