# Supplementary material
Source: PubMed Central journal article supplement (PMC3781977)
Supplement: supp_113.155341_FigureS5.pdf [file supp_113.155341_FigureS5.pdf]

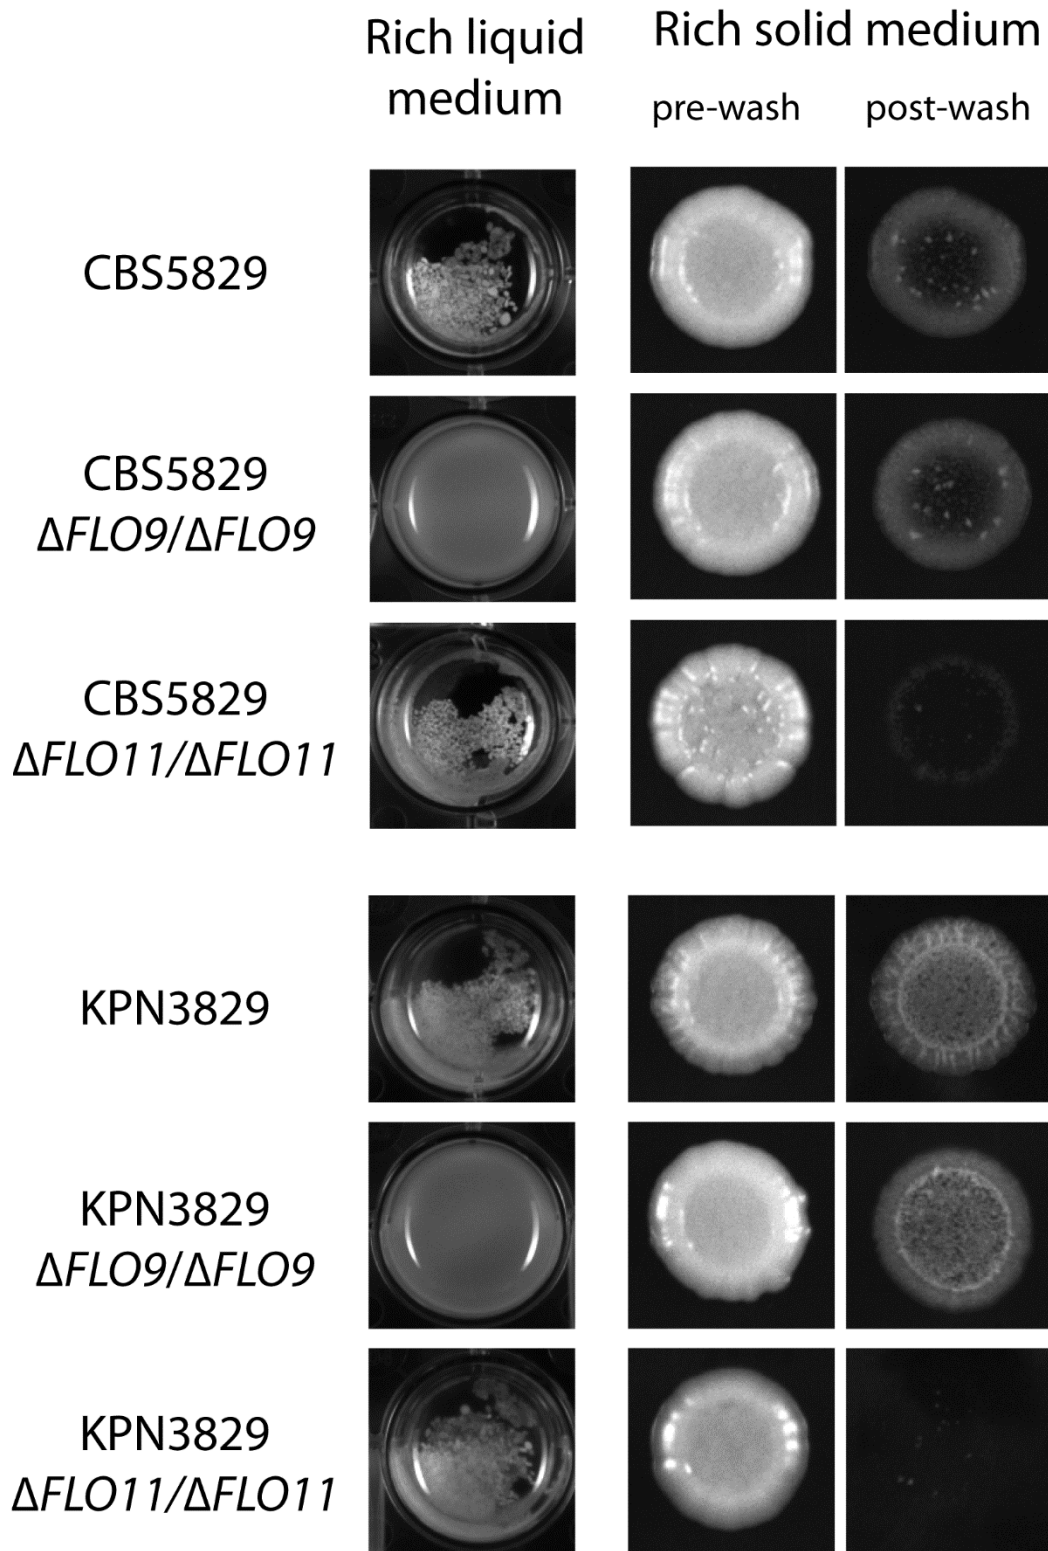

**Figure S5** *FLO9* and *FLO11* are terminal effectors of flocculation and invasive growth in multiple *S. paradoxus* strains. Data are as in Figure 2 of the main text except that flocculent European strains CBS5829 and KPN3829 were analyzed.
