# Supplementary material
Source: PubMed Central journal article supplement (PMC3781977)
Supplement: supp_113.155341_FigureS6.pdf [file supp_113.155341_FigureS6.pdf]

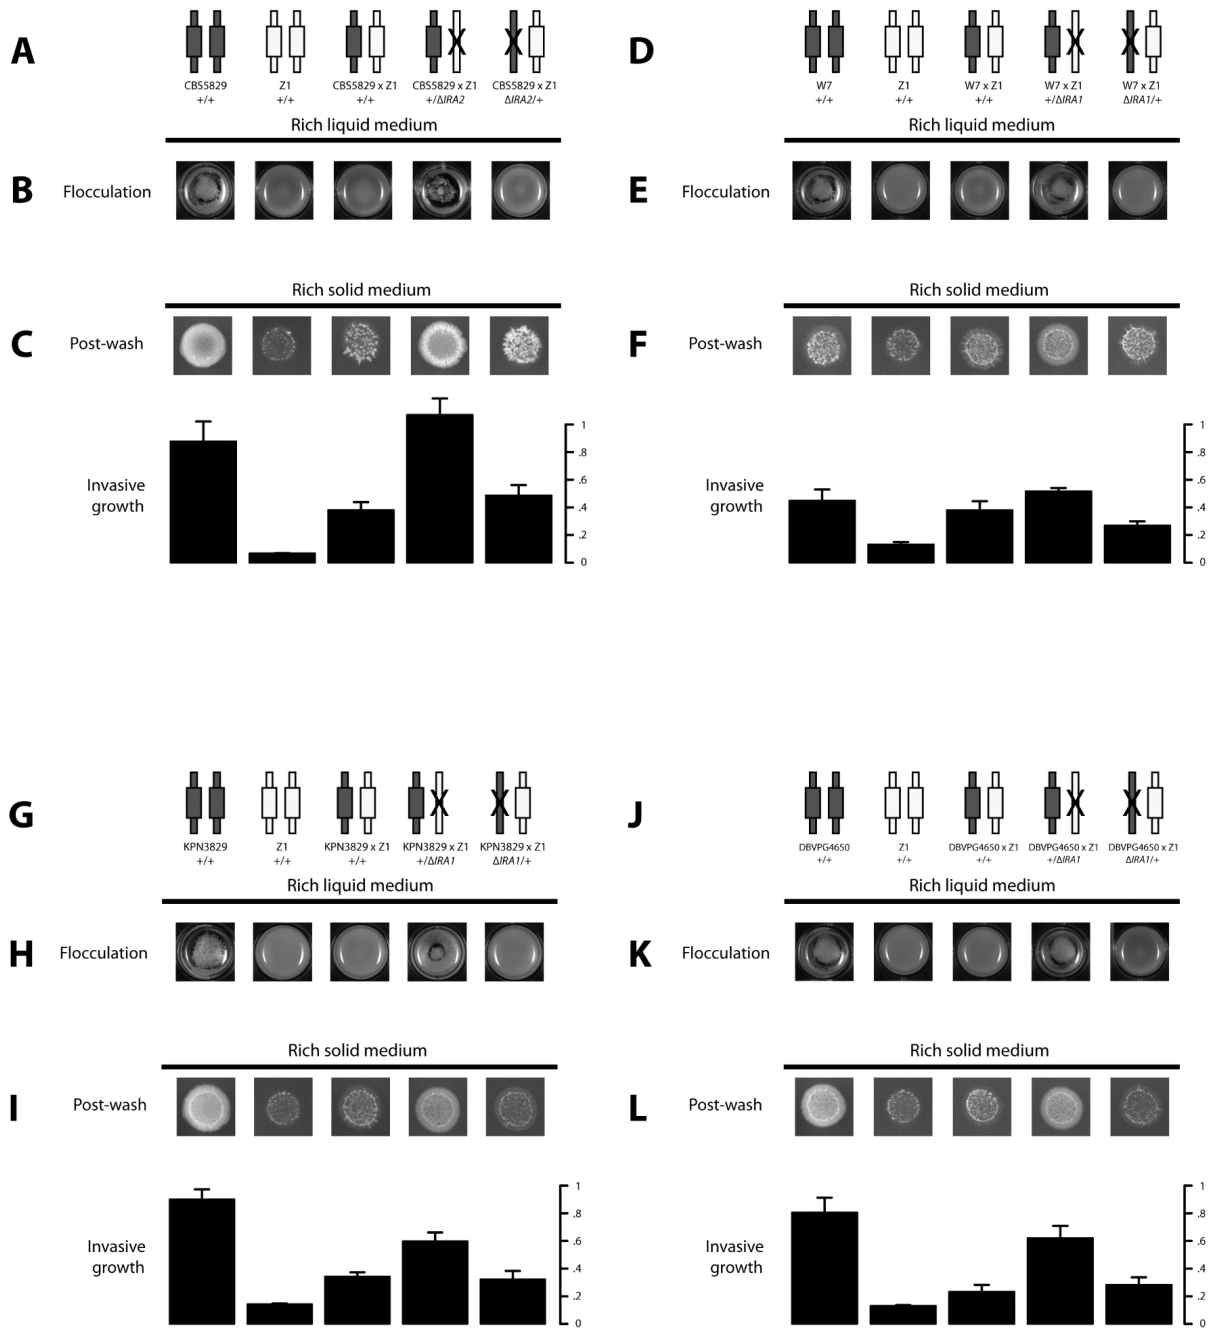

**Figure S6 Variation at *IRA1* and *IRA2* underlie flocculation and invasive growth.** Data are as in Figure 3 of the main text, except that flocculent European strains CBS5829 (A-C), W7 (D-F), KPN3829 (G-I), and DVBPG4650 (J-L) were analyzed.
