# Supplementary material
Source: PubMed Central journal article supplement (PMC3781977)
Supplement: supp_113.155341_FigureS11.pdf [file supp_113.155341_FigureS11.pdf]

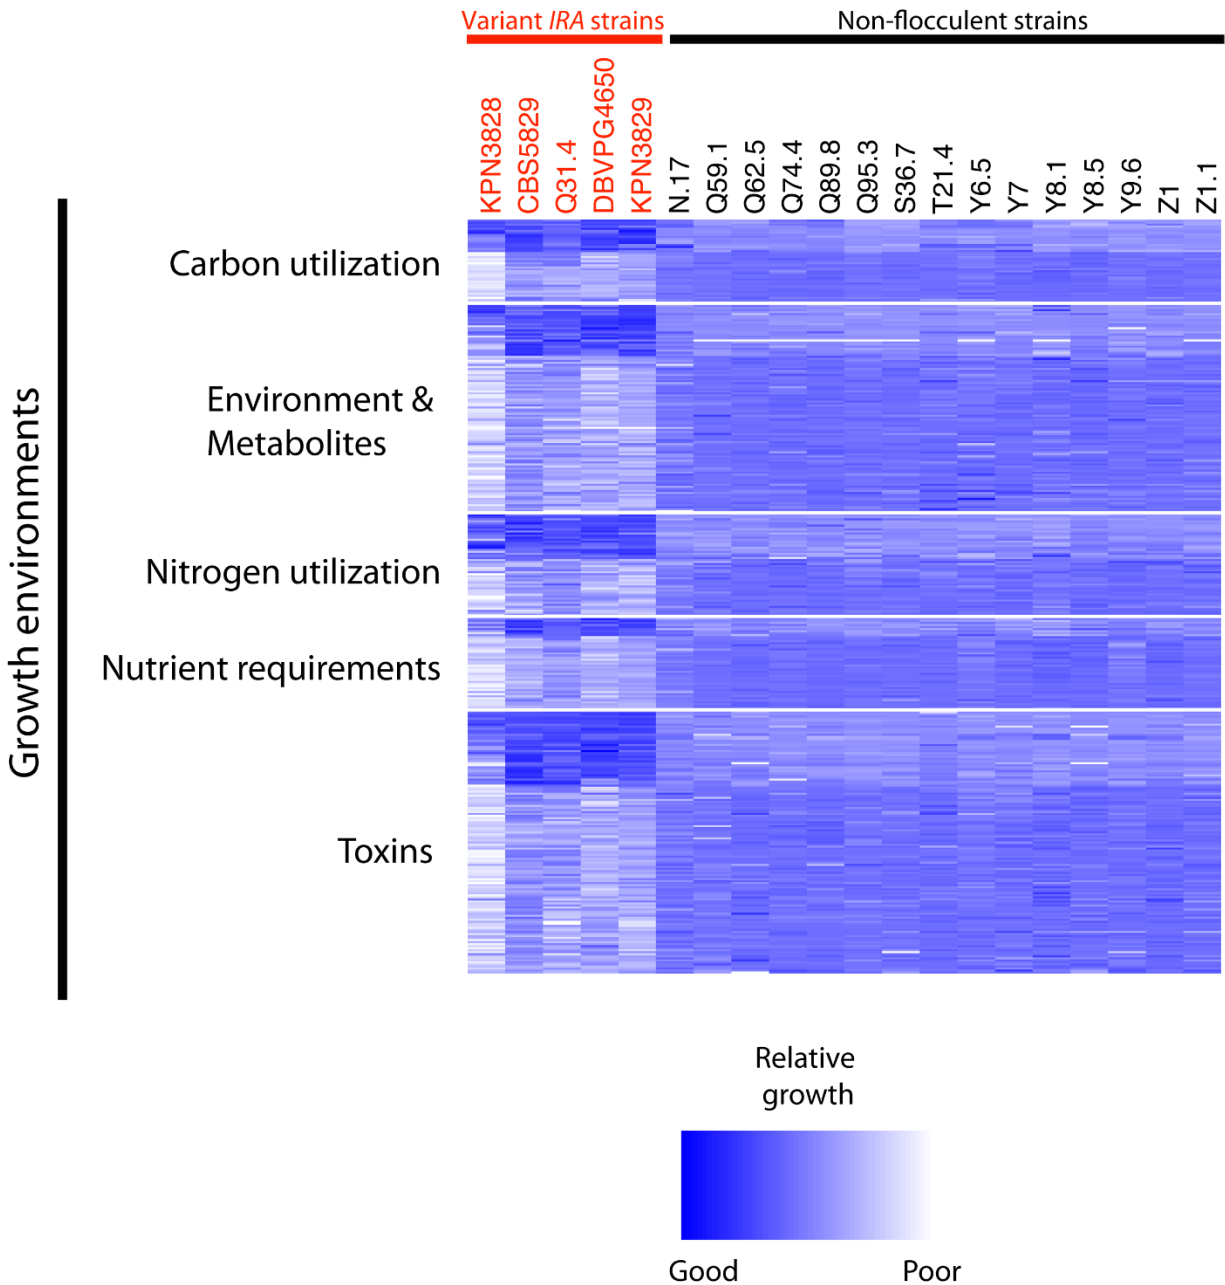

**Figure S11 Hundreds of growth traits across environmental treatments associate with variants in *IRA1* and *IRA2*.** Each column reports fitness measurements from a liquid culture of one strain, and each row reports measurements in one condition. For each row, measurements of lag time before resumption of log-phase growth after dilution into fresh medium, growth rate in log phase, or final culture density in stationary phase were taken from (Warringer et al. 2011) and normalized against the median across strains. Shown is each environment-parameter combination for which the difference between flocculent and invasive strains bearing variants in *IRA1* or *IRA2*, and the remainder of strains in the data set, reached a significance level corresponding to a false discovery rate less than 5%. Raw measurements for all environment-parameter combinations and significance estimates are provided in File S1.
