# Supplementary material
Source: PubMed Central journal article supplement (PMC3781977)
Supplement: supp_113.155341_FigureS12.pdf [file supp_113.155341_FigureS12.pdf]

**A**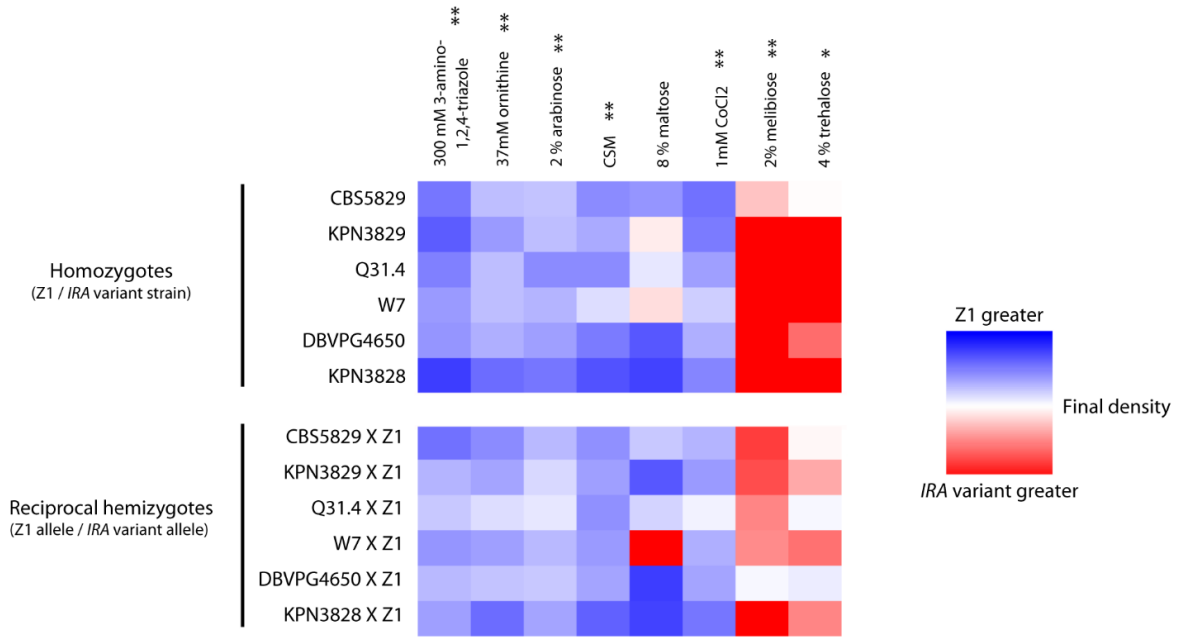**B**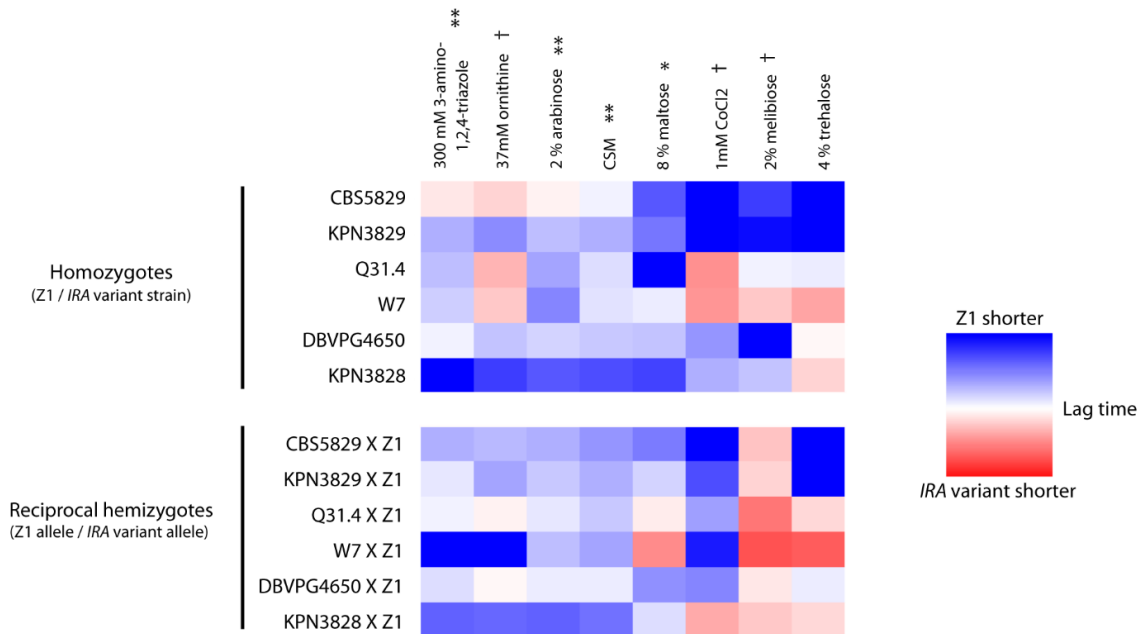

**Figure S12 Variation at *IRA1* and *IRA2* underlies differences between strains in final culture density and lag in multiple conditions.** Data are as in Figure 5B of the main text, except that final culture density in stationary phase (A) or lag time before resumption of log-phase growth after dilution into fresh medium (B) were analyzed. Media marked by † are those in which hemizygote hybrid strains bearing the variant *IRA* genes differed significantly from hemizygote hybrid strains bearing the Z1 allele at the *IRA* genes (Wilcoxon rank-sum test,  $p < 0.05$  after Bonferroni correction), but homozygote European strains bearing variant *IRA* genes did not differ significantly from Z1.
