# Supplementary material
Source: PubMed Central journal article supplement (PMC3781977)
Supplement: supp_113.155341_FigureS13.pdf [file supp_113.155341_FigureS13.pdf]

**A**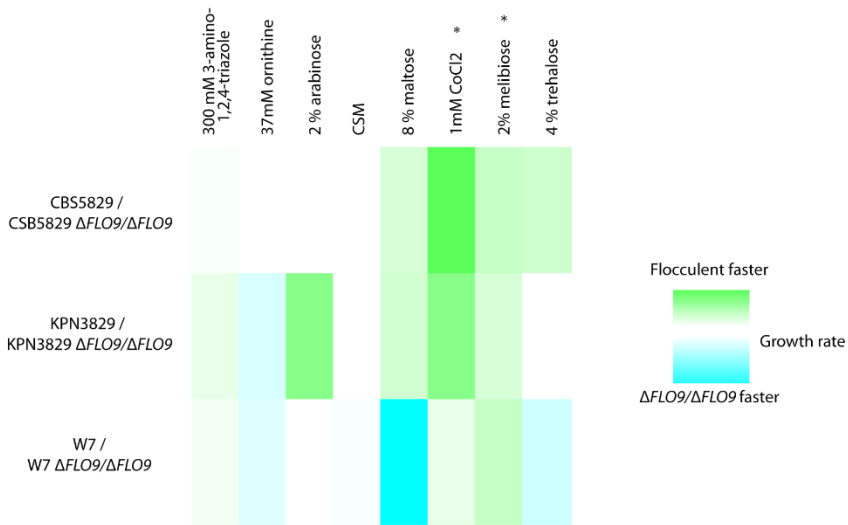**B**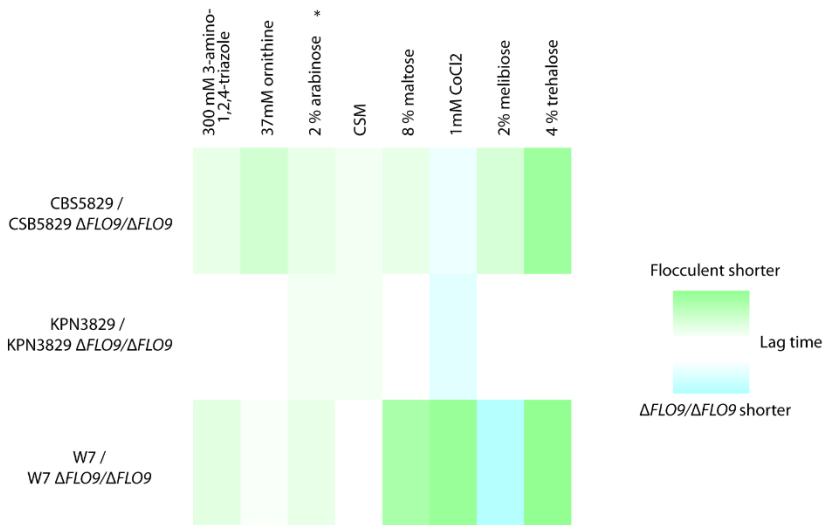**C**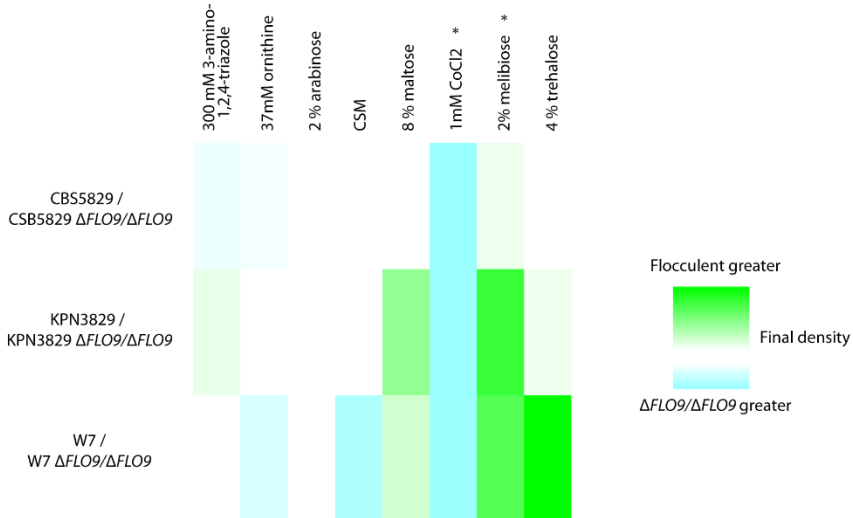

**Figure S13 Effect of flocculation on culture growth.** Each panel reports one growth parameter measured in liquid cultures of homozygous flocculent European strains and their engineered non-flocculent derivatives. In a given panel, each row reports results from one European strain and each row reports measurements in one medium. Color in each cell reports the indicated growth parameter in the indicated condition as a ratio of measurements from two strains: the indicated flocculent European strain and an isogenic non-flocculent strain homozygous for a null allele of *FLO9*. (A) Growth rate; (B) lag time; (C) cell density in stationary phase. In a given panel, media marked by \* are those in which growth of flocculent European strains differed significantly from non-flocculent *FLO9* mutants (Wilcoxon rank-sum test,  $p < 0.05$  after Bonferroni correction).  $\Delta$ , engineered loss-of-function allele. Raw measurements and significance estimates are given in Supplementary File S3.
