# Supplementary material
Source: PubMed Central journal article supplement (PMC3781977)
Supplement: supp_113.155341_FigureS14.pdf [file supp_113.155341_FigureS14.pdf]

**A**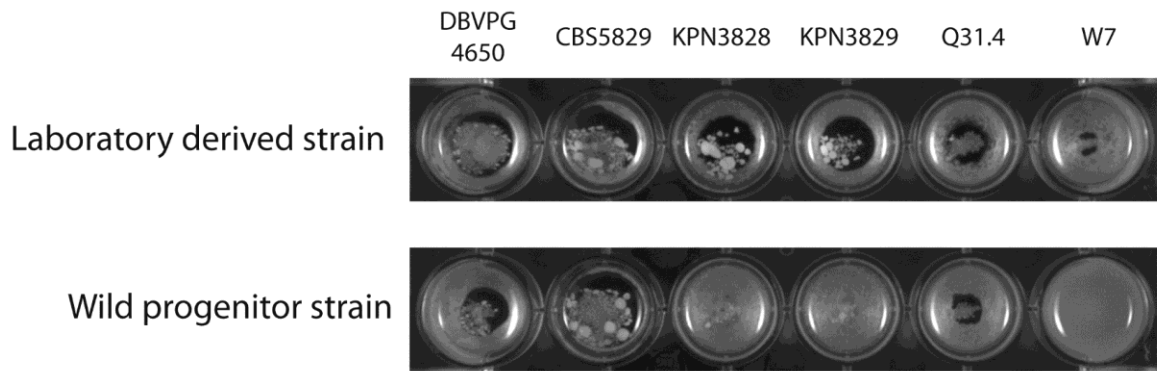**B**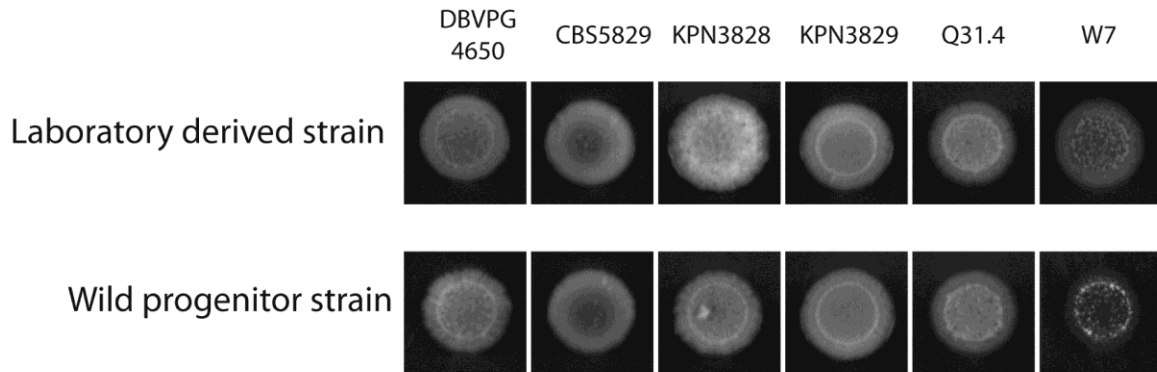

**Figure S14 Most wild European *S. paradoxus* strains exhibit the same morphologies as their laboratory derivatives.** Each panel shows morphologies in wild European *S. paradoxus* strains (top row) and their monosporic laboratory derivatives (bottom row). (A) Photographs of cultures after overnight growth in liquid rich medium as in Figure 1A of the main text. (B) Results of invasive growth assays of colonies grown on solid medium as in Figure 1B of the main text.
