# Supplementary material
Source: PubMed Central journal article supplement (PMC3781977)
Supplement: supp_113.155341_FigureS15.pdf [file supp_113.155341_FigureS15.pdf]

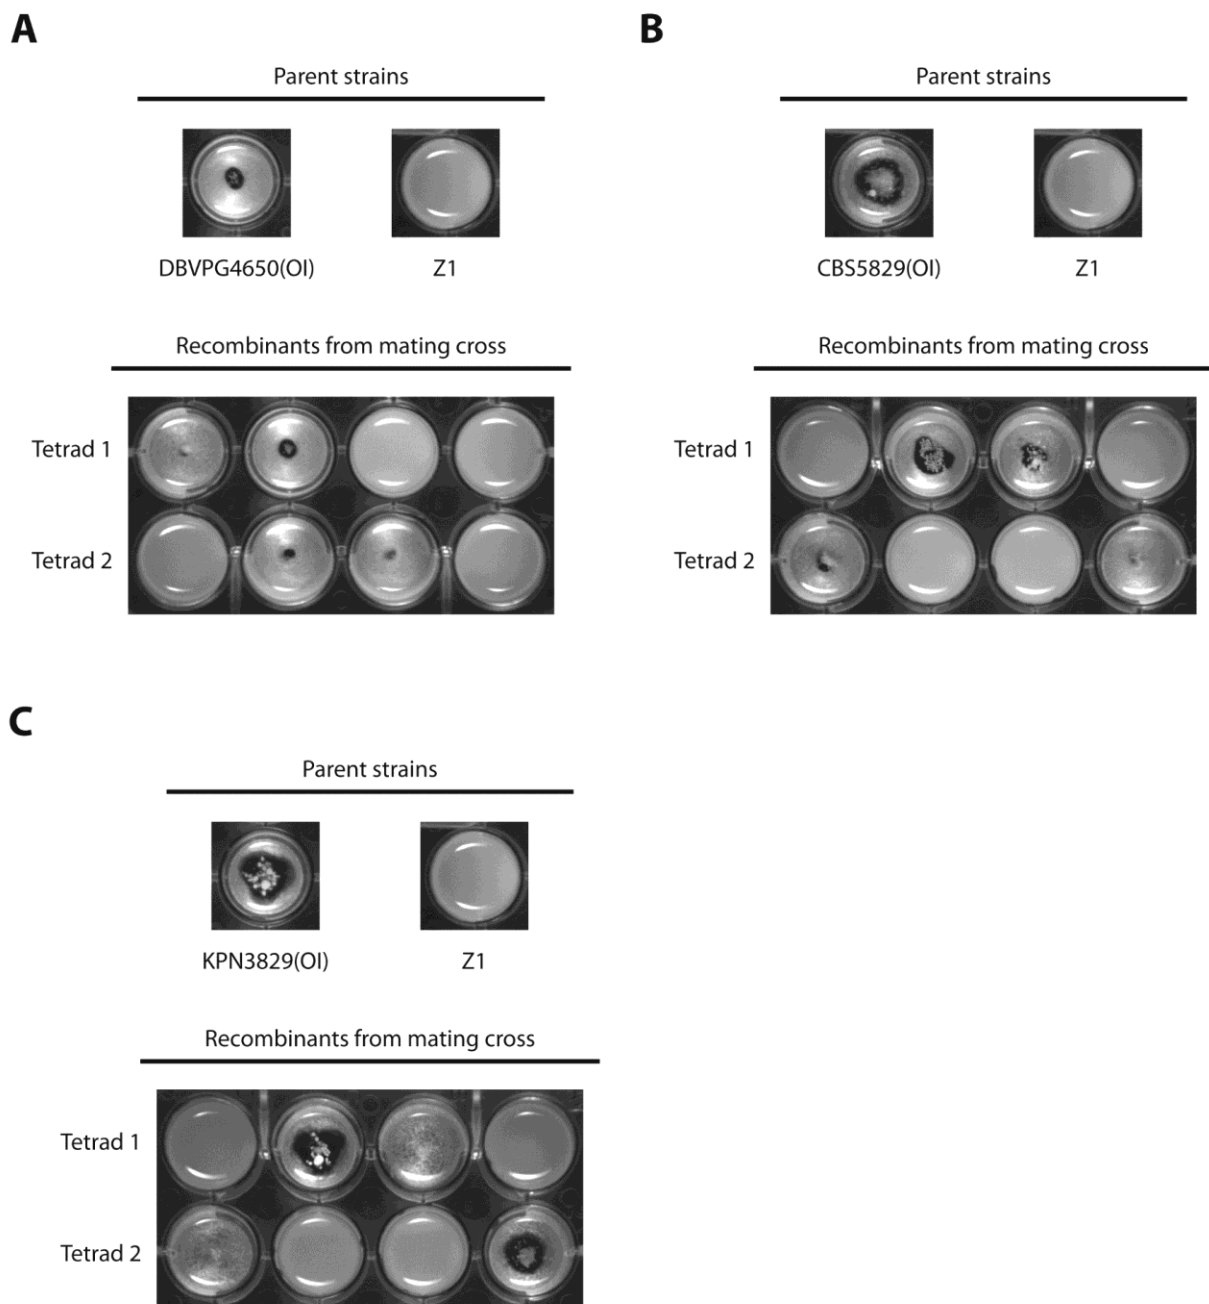

**Figure S15 Flocculation is a Mendelian trait in wild progenitor strains.** Each panel shows the growth phenotype in rich liquid media of a wild progenitor strain (original isolate, OI) and the Z1 non-flocculent strain (top), and recombinant progeny from a mating between these two parental strains (bottom). Recombinant progeny represent all four spores from two tetrad dissections, as indicated. (A) The flocculent wild progenitor of the DBVPG4650 strain crossed to Z1. (B) The flocculent wild progenitor of the CBS5829 strain crossed to Z1. (C) The flocculent wild progenitor of the KPN3829 strain crossed to Z1.
