# Supplementary material
Source: PubMed Central journal article supplement (PMC3781977)
Supplement: supp_113.155341_FigureS16.pdf [file supp_113.155341_FigureS16.pdf]

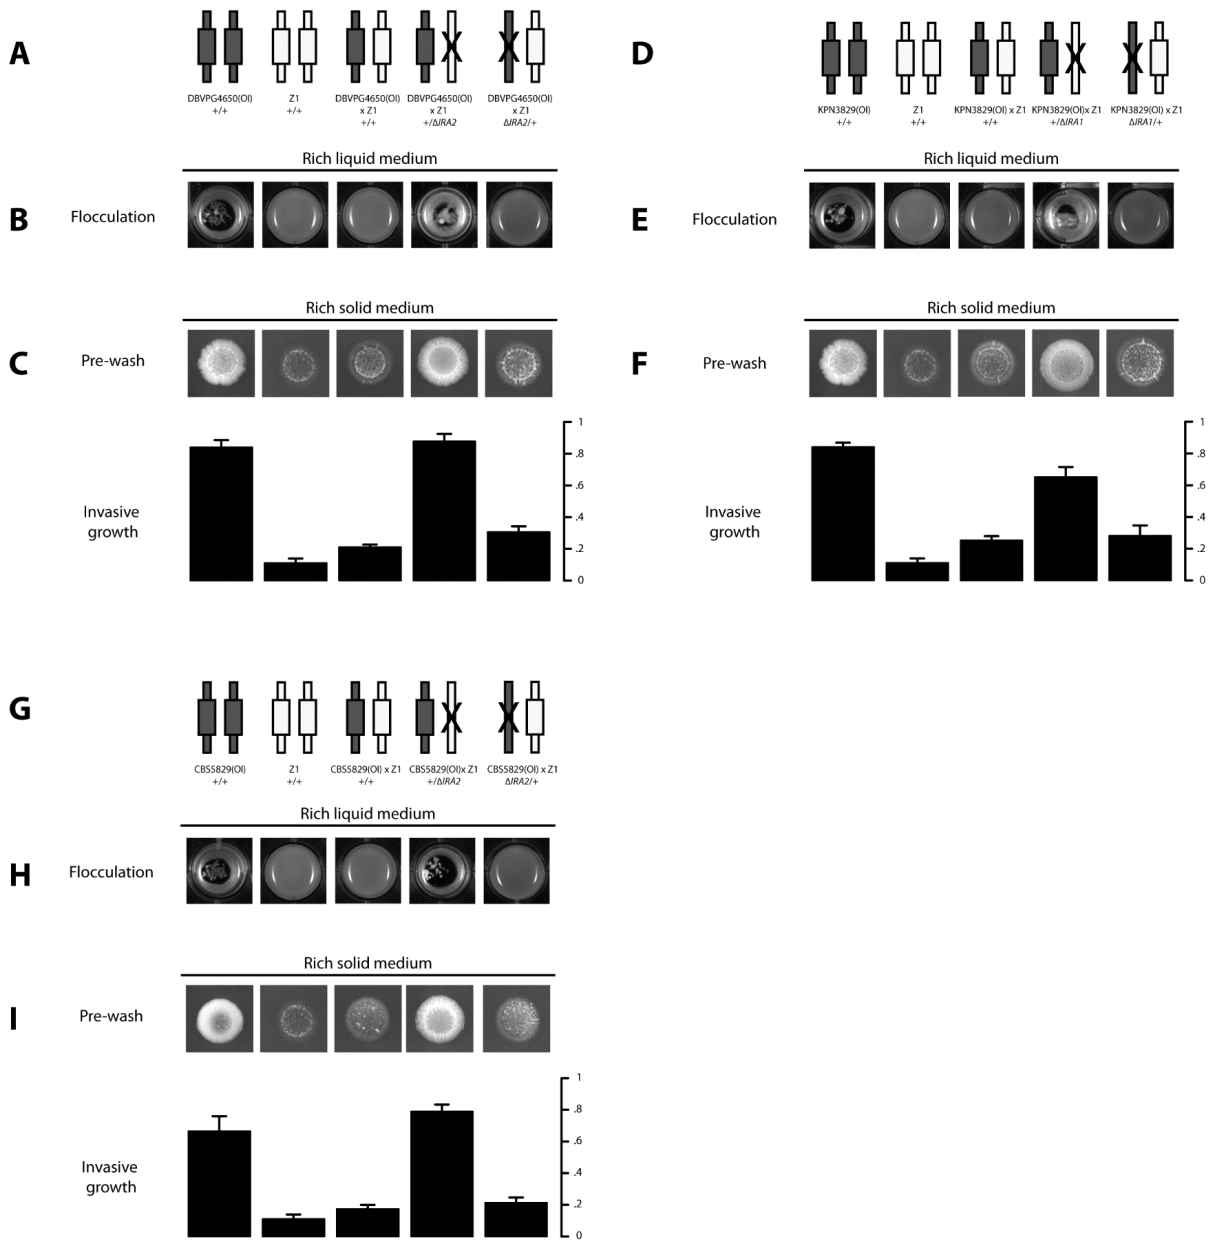

**Figure S16** Variation at *IRA1* and *IRA2* underlie flocculation and invasive growth in wild progenitor strains. Data are as in Figure 3 of the main text and Figure S6, except that the wild progenitors (original isolates, OI) of strains DBVPG4650 (A-C), KPN3829 (D-F) and CBS5829 (G-I), were analyzed.
