# Supplementary material
Source: PubMed Central journal article supplement (PMC3781977)
Supplement: supp_113.155341_TableS1.pdf [file supp_113.155341_TableS1.pdf]

**Table S1 Strains used in this work**

| <b>Strain</b> | <b>Parent(s)</b>  | <b>Genotype</b>                           | <b>Source</b> |
|---------------|-------------------|-------------------------------------------|---------------|
| Q31.4         |                   |                                           | NCYC          |
| Q32.3         |                   |                                           | NCYC          |
| Q59.1         |                   |                                           | NCYC          |
| Q62.5         |                   |                                           | NCYC          |
| Q69.8         |                   |                                           | NCYC          |
| Q74.4         |                   |                                           | NCYC          |
| Q89.8         |                   |                                           | NCYC          |
| Q95.3         |                   |                                           | NCYC          |
| S36.7         |                   |                                           | NCYC          |
| T21.4         |                   |                                           | NCYC          |
| W7            |                   |                                           | NCYC          |
| Y6.5          |                   |                                           | NCYC          |
| Y7            |                   |                                           | NCYC          |
| Y8.1          |                   |                                           | NCYC          |
| Y8.5          |                   |                                           | NCYC          |
| Y9.6          |                   |                                           | NCYC          |
| Z1            |                   |                                           | NCYC          |
| Z1.1          |                   |                                           | NCYC          |
| N-17          |                   |                                           | NCYC          |
| CBS432        |                   |                                           | NCYC          |
| CBS5829       |                   |                                           | NCYC          |
| DBVPG4650     |                   |                                           | NCYC          |
| KPN3828       |                   |                                           | NCYC          |
| KPN3829       |                   |                                           | NCYC          |
| YJR66         | Q31.4 X Z1        |                                           | this work     |
| YJR44         | W7 X Z1           |                                           | this work     |
| YJR119        | CBS432 X Z1       |                                           | this work     |
| YJR78         | CBS5829 X Z1      |                                           | this work     |
| YJR45         | KPN3828 X Z1      |                                           | this work     |
| YJR39         | KPN3829 X Z1      |                                           | this work     |
| YJR65         | DBVPG4650 X Z1    |                                           | this work     |
| YJR46         | W7 X KPN828       |                                           | this work     |
| YJR129        | KPN3829 X W7      |                                           | this work     |
| YJR130        | CBS5829 X KPN3828 |                                           | this work     |
| YJR91         | W7                | $\Delta FLO9::kanMX/\Delta FLO9::kanMX$   | this work     |
| YJR123        | KPN3829           | $\Delta FLO9::kanMX/\Delta FLO9::kanMX$   | this work     |
| YJR125        | CBS5829           | $\Delta FLO9::kanMX/\Delta FLO9::kanMX$   | this work     |
| YJR60         | W7                | $\Delta FLO11::kanMX/\Delta FLO11::kanMX$ | this work     |
| YJR59         | KPN3829           | $\Delta FLO11::kanMX/\Delta FLO11::kanMX$ | this work     |
| YJR127        | CBS5829           | $\Delta FLO11::kanMX/\Delta FLO11::kanMX$ | this work     |
| YJR67         | W7                | $\Delta flo1::kanMX/\Delta flo1::kanMX$   | this work     |
| YJR68         | W7                | $\Delta flo5::kanMX/\Delta flo5::kanMX$   | this work     |
| YJR69         | W7                | $\Delta flo10::kanMX/\Delta flo10::kanMX$ | this work     |
| YJR97         | YJR66             | $\Delta IRA1::kanMX/IRA1$ (Q31.4)         | this work     |
| YJR98         | YJR66             | $\Delta IRA1::kanMX/IRA1$ (Z1)            | this work     |
| YJR58         | YJR44             | $\Delta IRA1::kanMX/IRA1$ (W7)            | this work     |
| YJR57         | YJR44             | $\Delta IRA1::kanMX/IRA1$ (Z1)            | this work     |
| YJR120        | YJR39             | $\Delta IRA1::kanMX/IRA1$ (KPN3829)       | this work     |
| YJR121        | YJR39             | $\Delta IRA1::kanMX/IRA1$ (Z1)            | this work     |
| YJR117        | YJR65             | $\Delta IRA1::kanMX/IRA1$ (DBVPG4650)     | this work     |
| YJR118        | YJR65             | $\Delta IRA1::kanMX/IRA1$ (Z1)            | this work     |
| YJR105        | YJR78             | $\Delta IRA2::kanMX/IRA2$ (CBS5829)       | this work     |
| YJR106        | YJR78             | $\Delta IRA2::kanMX/IRA2$ (Z1)            | this work     |
| YJR134        | YJR45             | $\Delta IRA2::kanMX/IRA2$ (KPN3828)       | this work     |

|               |       |                                  |               |
|---------------|-------|----------------------------------|---------------|
| YJR135        | YJR45 | <i>ΔIRA2::kanMX/IRA2</i> (Z1)    | this work     |
| YJR100        | Z1    | <i>ΔIRA2::kanMX/ΔIRA2::kanMX</i> | this work     |
| YJR101        | Z1    | <i>ΔIRA1::kanMX/ΔIRA1::kanMX</i> | this work     |
| Q31.4(OI)     |       |                                  | V. Koufopanou |
| W7(OI)        |       |                                  | V. Koufopanou |
| KPN3828(OI)   |       |                                  | G. Liti       |
| CBS5829(OI)   |       |                                  | G. Liti       |
| DBVPG4650(OI) |       |                                  | G. Liti       |
| KPN3829(OI)   |       |                                  | G. Liti       |

---

OI, Original isolate.
