# Supplementary material
Source: PubMed Central journal article supplement (PMC3781977)
Supplement: supp_113.155341_TableS2.pdf [file supp_113.155341_TableS2.pdf]

**Table S2** *IRA1* and *IRA2* have high nucleotide diversity in *S. paradoxus* populations

| Population <sup>a</sup> | Proportion CDS<br>with $\pi > IRA1^b$ | Proportion CDS<br>with $\pi > IRA2^c$ |
|-------------------------|---------------------------------------|---------------------------------------|
| European                | .307                                  | .004                                  |
| American                | .049                                  | .071                                  |
| Far East                | .052                                  | .037                                  |

<sup>a</sup> *S. paradoxus* population as in (Liti et al. 2009).

<sup>b</sup> The proportion of gene-coding regions (CDS) with higher nucleotide diversity ( $\pi$ ) than *IRA1* across the indicated population.

<sup>c</sup> The proportion of gene-coding regions with higher nucleotide diversity than *IRA2* across the indicated population.
